# Supplementary material for: SARS-CoV-2 wastewater surveillance in Germany: long-term PCR monitoring, suitability of primer/probe combinations and biomarker stability
Source: bioRxiv or medRxiv preprint supplement (doi:10.1101/2021.09.16.21263575), 2021-09-21
Supplement: Supplementary file [file media-1.pdf]

## Supplementary Information

### Manuscript: SARS-CoV-2 wastewater surveillance in Germany: long-term PCR monitoring, suitability of primer/probe combinations and biomarker stability

Authors: Johannes Ho, Claudia Stange, Rabea Suhrborg, Christian Wurzbacher, Jörg E.

Drewes, Andreas Tiehm

|       | Infection value shift in days |      |      |      |      |      |      |      |      |      |      |      |      |      |      |      |      |      |      |      |      |      |
|-------|-------------------------------|------|------|------|------|------|------|------|------|------|------|------|------|------|------|------|------|------|------|------|------|------|
| $r^2$ | 0                             | 1    | 2    | 3    | 4    | 5    | 6    | 7    | 8    | 9    | 10   | 11   | 12   | 13   | 14   | 15   | 16   | 17   | 18   | 19   | 20   | 21   |
|       | 0.44                          | 0.49 | 0.56 | 0.60 | 0.63 | 0.67 | 0.71 | 0.75 | 0.77 | 0.80 | 0.81 | 0.83 | 0.85 | 0.86 | 0.87 | 0.88 | 0.89 | 0.88 | 0.87 | 0.85 | 0.84 | 0.83 |

Fig. S1. Correlation coefficients ( $r^2$ ) for infection numbers and biomarker concentrations with different time shifts from 0 to 21 days for the infection numbers. P values with Bonferroni-correction were below 0.001 for all correlations.

### Linear regression

Infection data not shifted (original data)

**Without intercept**

$$y = 6.65x$$

$$R^2 = 0.44$$

$$n = 89$$

$$p < 0.001$$

$$\text{LOQt: } 16.6 / 100,000$$

**With intercept**

$$y = 5.11x + 39.98$$

$$R^2 = 0.51$$

$$n = 89$$

$$p < 0.001$$

$$\text{LOQt: } 52.8 / 100,000$$

Infection data shifted by 16 days

**Without intercept**

$$y = 7.29x$$

$$R^2 = 0.89$$

$$n = 89$$

$$p < 0.001$$

$$\text{LOQt: } 18.2 / 100,000$$

**With intercept**

$$y = 6.74x + 9.21$$

$$R^2 = 0.91$$

$$n = 89$$

$$p < 0.001$$

$$\text{LOQt: } 26.1 / 100,000$$

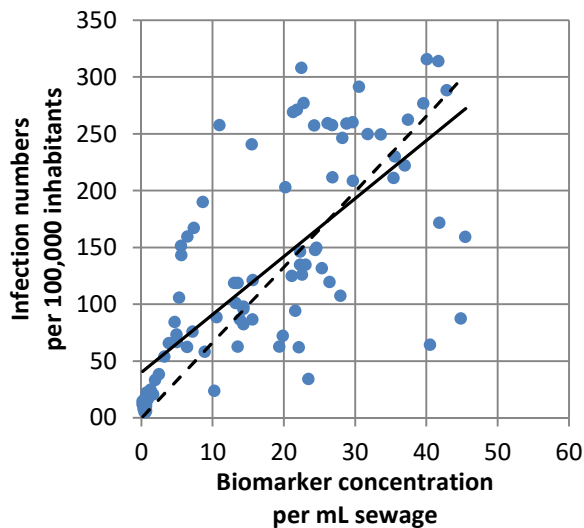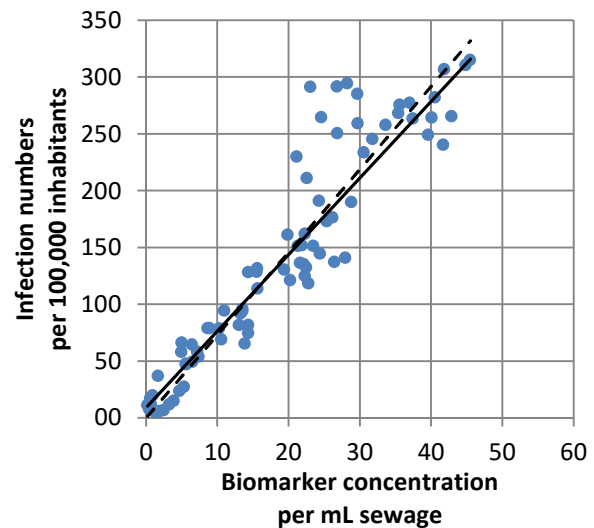

- - - trendline, intersection with 0,0

— trendline, w/o intersection

Fig. S2. Linear regression for infection data and ddPCR values (E and ORF gene as sliding average of three values). Left: original data, right: infection numbers were time-shifted by 16 days. Statistical analysis above each plot for each trend line with and without intercept. P values with Bonferroni-correction were below 0.001 for all correlations.

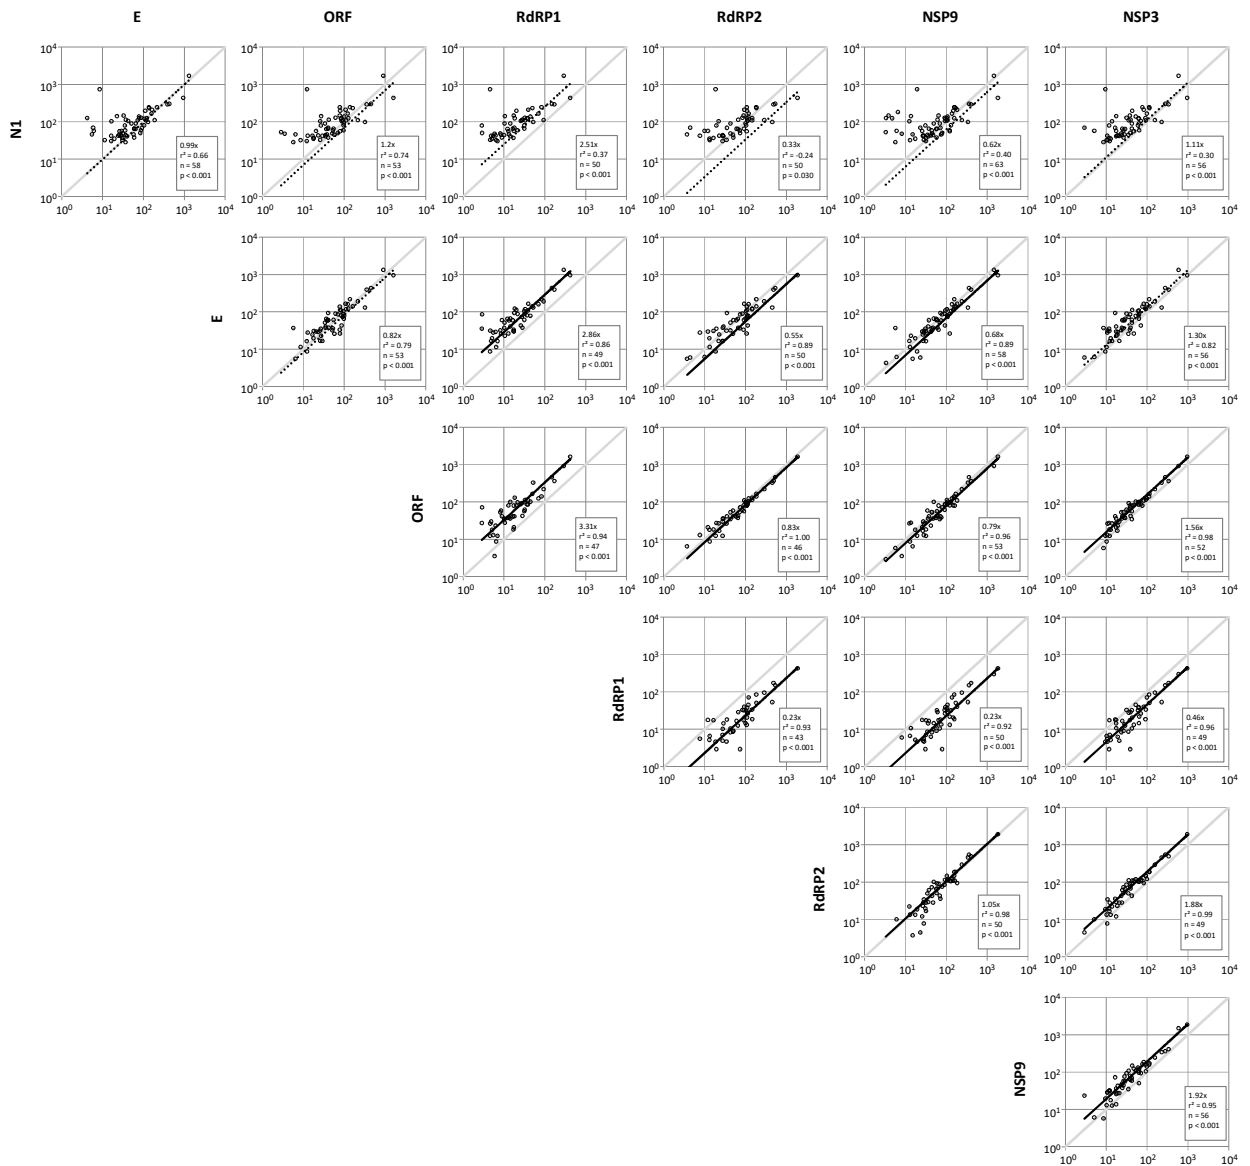

**Fig. S3.** Linear regressions of seven different primer/probe assays using a selection of 64 samples. Charts show gene copies per mL wastewater.

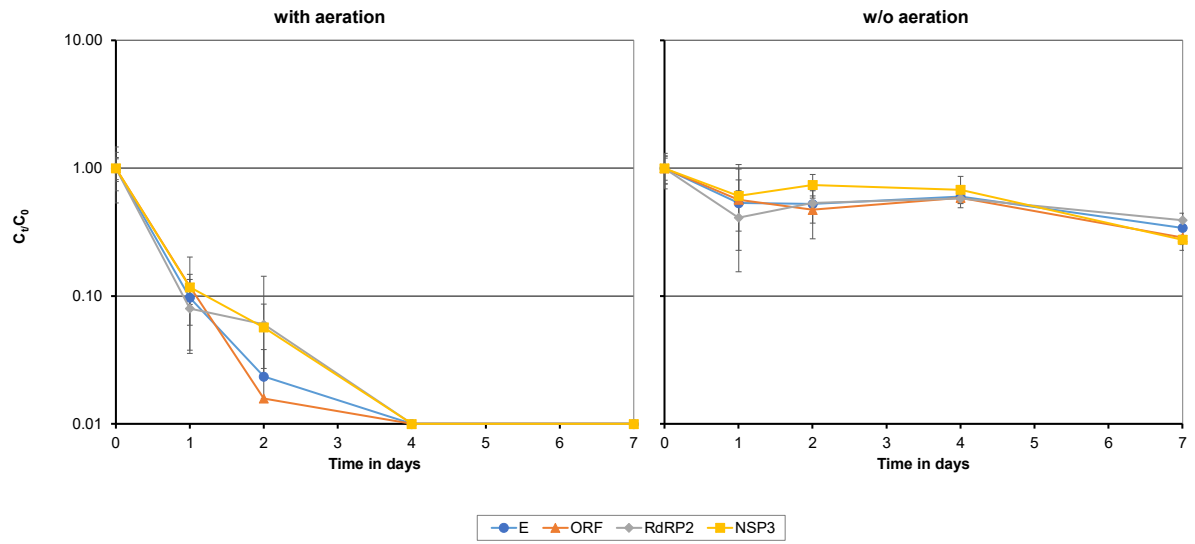

**Fig. S4.** Decay of SARS-CoV-2 specific targets over time in wastewater samples aerated with air (left) or nitrogen (right). Error bars represent standard deviations for the three independent test bottles (n = 3).
